# Supplementary material for: Rapid, Label-free Pathogen Identification System for Multidrug-Resistant Bacterial Wound Infection Detection on Military Members in the Battlefield
Source: Research Square preprint supplement (doi:10.21203/rs.3.rs-865537/v1), 2021-09-07

Figure S1. Robust (i.e. small variation between samples in the same dataset) and reproducible (i.e. small variation between datasets acquired during different trials) bacteria ATR spectra for *E. cloacae* BAA2341, *E. cloacae* 13047, *E.coli* BAA2523 and *S. aureus* 29213 from multiple trials.

Figure S2. Compare averaged ATR spectra of the bacteria cell before and after incubation with antimicrobial solution at 35 °C for 4 hours. The spectrum from the antimicrobial solution used in the experiment are shown in black for each strains.


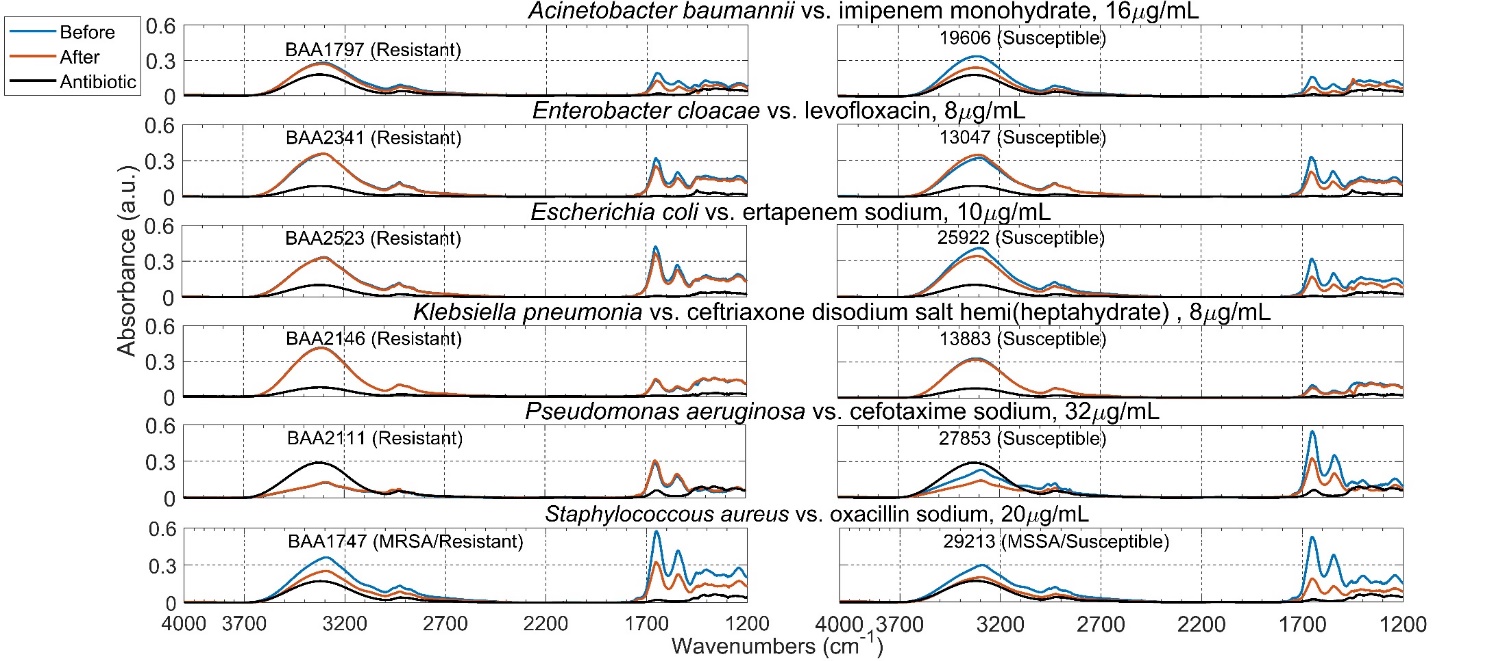

Supplement: Supplementary file 1 [file b0223f30db8b1c32a76ce5fb.docx]
